# Supplementary material for: Screening for cervical cancer in imprisoned women in Brazil
Source: PubMed Central journal article supplement (PMC5734681; doi:10.1371/journal.pone.0187873), 2017-12-18
Supplement: pone.0187873.s001.pdf [file pone.0187873.s001.pdf]

## INSTRUMENT FOR DATA COLLECTION OF THE ENCARCERATED'S WOMEN

County:

Date:

Prison unit:

Women's order number:

### I: Characterization of the internal:

01 - Age \_\_\_\_\_ years old.

02 - Race / color:

- a.  White
- b.  Brown
- c.  Black
- d.  Yellow
- e.  Indigenous

03 - Nationality: \_\_\_\_\_

04 - Municipality of residence before prison: \_\_\_\_\_

05 - Time in confinement (years, months): \_\_\_\_\_

06 - Marital Status:

- a.  Married
- b.  Decided or judicially separated
- c.  Divorced
- d.  Widow
- e.  Single
- f.  Stable union

07 - Degree of education:

- a.  Uneducated
- b.  Incomplete elementary school
- c.  Complete primary education
- d.  Incomplete secondary school
- e.  Complete high school
- f.  Incomplete higher
- g.  Graduated

08 - Previous occupation: \_\_\_\_\_

09 - What is the income of your entire family (add up all the gross wages, without deductions from the people of your working family group, including your income \_\_\_\_\_ (in reais).

10 - How many people depend on this income (only those who live in the house, including you)? \_\_\_\_\_.

11 - Do you visit your family / friends?

- a. ( ) Yes  
b. ( ) No  
If so, how often? \_\_\_\_\_

- 12-Do you receive intimate visits?  
a. ( ) Yes  
b. ( ) No  
If so, how often? \_\_\_\_\_

**II-Personal history:**

- 13-Smoke:  
a. ( ) Make use  
b. ( ) Already make use  
c. ( ) Never make use  
If so, how many cigarettes per day? \_\_\_\_\_

- 14-Have you ever used any illicit drugs?  
a. ( ) Yes  
b. ( ) No  
If yes, how often in the year, month or week (1, 2, 3, 4, 5,..., how many times)?\_\_\_\_\_.

**III - Gynecological and obstetric history:**

15 - Menarche (in years): \_\_\_\_\_.

16 - Coitarca (in years): \_\_\_\_\_.

17 - Gestation \_\_\_\_\_ For\_\_\_\_\_ Abortion\_\_\_\_\_

- 18 - Contraceptive pill:  
a. ( ) Make use  
b. ( ) Already make use  
c. ( ) Never make use

- 19-Condom in sexual relations:  
a. ( ) Make use  
b. ( ) Already make use  
c. ( ) Never make use

- 20-Have you ever had any gynecological problems?  
a. ( ) Yes  
b. ( ) No  
c. ( ) She doesn't know

If \_\_\_\_\_ yes, \_\_\_\_\_ what \_\_\_\_\_ was \_\_\_\_\_ the  
problem?\_\_\_\_\_.

- 21 - Have you heard about cervical cancer screening?  
a. ( ) Yes  
b. ( ) No

22–Do you know the importance of performing cervical cancer screening?

- a.  Yes
- b.  No

23–Before you go to prison, have you ever had a cervical cancer screening?

- a.  Yes
- b.  No
- c.  Cannot remember

If yes, when (year) \_\_\_\_\_

24–Has there been any change in the test result?

- a.  Yes
- b.  No
- c.  She doesn't know
- d.  Cannot remember

If yes, what type of alteration? \_\_\_\_\_

25–If the answer to the previous question is yes, performed treatment?

- a.  Yes
- b.  No
- c.  She doesn't know
- d.  Cannot remember

If yes, Which treatment? \_\_\_\_\_

**IV: Characterization of health care related to the Control of Cervical Cancer:**

26–When you entered this Prison unit, were you asked if you had already taken the cervical cancer screening test?

- a.  Yes
- b.  No
- c.  Cannot remember

27–Have you performed the collection of the preventive examination after arrival at the prison unit?

- a.  Yes
- b.  No
- c.  Cannot remember

If yes, When (year) \_\_\_\_\_

28–If the answer to the previous question is no, why didn't performed preventive examination?

\_\_\_\_\_

\_\_\_\_\_

\_\_\_\_\_

29 - Was the collection of the preventive examination performed after arrival at the prison unit, where the examination was carried out?

- a.  Prison unit
- b.  Health unit

c. ( ) Others: \_\_\_\_\_

30–Has there been any change in the test result?

- a. ( ) Yes
- b. ( ) No
- c. ( ) Cannot answer

31–If yes, did you receive information about the change identified in the preventive examination?

- a. ( ) Yes
- b. ( ) No
- c. ( ) Cannot answer

32–Has any treatment been performed because the alteration presented in the preventive exam?

- a. ( ) Yes
- b. ( ) No
- c. ( ) Cannot answer

If yes, what treatment (periodicity of consultations and type of treatment received)?

---

---

---

---

33–If any treatment was performed, where was it performed?

- a. ( ) Prison unit
- b. ( ) Health unit
- c. ( ) Center of Specialties
- d. ( ) Others. Which are: \_\_\_\_\_

34–What is the treatment situation?

- a. ( ) It was finalized
- b. ( ) Not finalized
- c. ( ) It is treating
- d. ( ) Cannot answer

35–If the answer to the previous question is interrupted treatment, can you tell why the treatment was interrupted?

---

---

---

---
