# Supplementary material for: Screening for cervical cancer in imprisoned women in Brazil
Source: PubMed Central journal article supplement (PMC5734681; doi:10.1371/journal.pone.0187873), 2017-12-18
Supplement: pone.0187873.s002.pdf [file pone.0187873.s002.pdf]

## INSTRUMENT FOR DATA COLLECTION OF THE ENCARCERATED'S WOMEN MEDICAL RECORDS

County:

Date:

Prison unit:

Women's order number:

|                                                                                                                                                                                             |                                                                                                                               |                                                                                                                                                                                                                                          |
|---------------------------------------------------------------------------------------------------------------------------------------------------------------------------------------------|-------------------------------------------------------------------------------------------------------------------------------|------------------------------------------------------------------------------------------------------------------------------------------------------------------------------------------------------------------------------------------|
| <b>I: Characterization of the internal</b>                                                                                                                                                  |                                                                                                                               |                                                                                                                                                                                                                                          |
| 01- Age _____ years old.                                                                                                                                                                    |                                                                                                                               |                                                                                                                                                                                                                                          |
| <b>II: Characterization of health care related to the Control of Cervical Cancer</b>                                                                                                        |                                                                                                                               |                                                                                                                                                                                                                                          |
| 02–The oncotic colpocytology examination was collected after the arrival of the woman in the prison unit:<br>a. ( ) Yes<br>b. ( ) No<br>c. ( ) No record information<br>If yes, when (year) |                                                                                                                               |                                                                                                                                                                                                                                          |
| 03–Place where the collection was made after the arrival of the woman in the Prison unit:<br>a. ( ) Prison unit<br>b. ( ) No record information<br>c. ( ) Others:                           |                                                                                                                               |                                                                                                                                                                                                                                          |
| 04–Record of the results of the oncotic colpocytology examination:<br>a. ( ) Yes<br>b. ( ) No<br>c. ( ) No record information                                                               |                                                                                                                               |                                                                                                                                                                                                                                          |
| 05–Result of oncotic colpocytology examination - Within the limits of normality in the material examined:<br>a. ( ) Yes<br>b. ( ) No<br>c. ( ) No record information                        |                                                                                                                               |                                                                                                                                                                                                                                          |
| 06 - According to the alteration presented in the result of the oncotic colpocytology examination, which was performed:                                                                     |                                                                                                                               |                                                                                                                                                                                                                                          |
| 1                                                                                                                                                                                           | Atypical squamous cells of undetermined significance, possibly non-neoplastic (ACU-US)                                        | a. ( ) Repeats the cytopathological examination in 06 months.<br>b. ( ) Repeats the cytopathological examination in 12 months.<br>c. ( ) Forwards to other levels of health care.<br>d. ( ) No record information<br>e. ( ) Others:_____ |
| 2                                                                                                                                                                                           | Células escamosas atípicas de significado indeterminado, quando não se pode excluir lesão intraepitelial de alto grau (ASC-H) | a. ( ) Repeats the cytopathological examination in 06 months.<br>b. ( ) Repeats the cytopathological examination in 12 months.<br>c. ( ) Forwards to other levels of health care.<br>d. ( ) No record information<br>e. ( ) Others:_____ |
| 3                                                                                                                                                                                           | Atypical glandular cells of undetermined significance, possibly non-neoplastic or                                             | a. ( ) Repeats the cytopathological examination in 06 months.<br>b. ( ) Repeats the cytopathological examination                                                                                                                         |

|                                                                                                                                                        |                                                                                                                                                  |                                                                                                                                                                                                                                          |
|--------------------------------------------------------------------------------------------------------------------------------------------------------|--------------------------------------------------------------------------------------------------------------------------------------------------|------------------------------------------------------------------------------------------------------------------------------------------------------------------------------------------------------------------------------------------|
|                                                                                                                                                        | when high-grade intraepithelial lesion cannot be excluded (AGS).                                                                                 | in 12 months.<br>c. ( ) Forwards to other levels of health care.<br>d. ( ) No record information<br>e. ( ) Others:_____                                                                                                                  |
| 4                                                                                                                                                      | Atypical cells of indefinite origin                                                                                                              | a. ( ) Repeats the cytopathological examination in 06 months.<br>b. ( ) Repeats the cytopathological examination in 12 months.<br>c. ( ) Forwards to other levels of health care.<br>d. ( ) No record information<br>e. ( ) Others:_____ |
| 5                                                                                                                                                      | Low-grade squamous intraepithelial lesion (LSIL)                                                                                                 | a. ( ) Repeats the cytopathological examination in 06 months.<br>b. ( ) Repeats the cytopathological examination in 12 months.<br>c. ( ) Forwards to other levels of health care.<br>d. ( ) No record information<br>e. ( ) Others:_____ |
| 6                                                                                                                                                      | High-grade intraepithelial lesion (HSIL)                                                                                                         | a. ( ) Repeats the cytopathological examination in 06 months.<br>b. ( ) Repeats the cytopathological examination in 12 months.<br>c. ( ) Forwards to other levels of health care.<br>d. ( ) No record information<br>e. ( ) Others:_____ |
| 7                                                                                                                                                      | High-grade intraepithelial lesion not being able to exclude microinvasion or invasive squamous cell carcinoma or clinical suspicion of invasion. | a. ( ) Repeats the cytopathological examination in 06 months.<br>b. ( ) Repeats the cytopathological examination in 12 months.<br>c. ( ) Forwards to other levels of health care.<br>d. ( ) No record information<br>e. ( ) Others:_____ |
| 8                                                                                                                                                      | Adenocarcinoma in situ (AIS) and invasive                                                                                                        | a. ( ) Repeats the cytopathological examination in 06 months.<br>b. ( ) Repeats the cytopathological examination in 12 months.<br>c. ( ) Forwards to other levels of health care.<br>d. ( ) No record information<br>e. ( ) Others:_____ |
| 07–Treatment for the woman who presented the result of the altered colposcopic examination:<br>a. ( ) Yes<br>b. ( ) No<br>c. ( ) No record information |                                                                                                                                                  |                                                                                                                                                                                                                                          |
| 08–There was a referral from the woman:<br>a. ( ) Yes<br>b. ( ) No<br>c. ( ) No record information                                                     |                                                                                                                                                  |                                                                                                                                                                                                                                          |
| 09–If the woman was referred to what level of attention:<br>a. ( ) Primary care level                                                                  |                                                                                                                                                  |                                                                                                                                                                                                                                          |

|                                                                                                                                                                                                                                                                                                      |
|------------------------------------------------------------------------------------------------------------------------------------------------------------------------------------------------------------------------------------------------------------------------------------------------------|
| b. ( ) Secondary care level<br>c. ( ) Tertiary care level                                                                                                                                                                                                                                            |
| 10–If the woman was referred with a result of the altered colpocytological examination to another health care service, there is a record of whether the team received information about the behaviors adopted for the treatment of women:<br>a. ( ) Yes<br>b. ( ) No<br>c. ( ) No record information |
| 11–If the answer to the previous question is yes, what were the types of conduct adopted:<br>a. ( ) Colposcopy<br>b. ( ) Biopsy<br>c. ( ) Conization<br>d. ( ) Exercise of Transformation Zone (EZT)<br>e. ( ) Hysterectomy<br>f. ( ) Forwarding to the tertiary unit<br>g. ( ) Others               |
| 12 - Treatment:<br>a. ( ) It was finalized<br>b. ( ) Not finalized<br>c. ( ) It is treating<br>d. ( ) No record information                                                                                                                                                                          |
